# Supplementary material for: CO2-switchable fluorescence of a dendritic polymer and its applications
Source: Royal Society of Chemistry journal article supplement (doi:10.1039/c5nr06729d), 2015-11-30
Supplement: c5nr06729d1.pdf [file c5nr06729d1.pdf]

### **Supplementary Information**

#### **CO<sub>2</sub>-switchable fluorescence of dendritic polymer and its application**

Chunmei Gao\*, Shaoyu Lü, Mingzhu Liu\*, Can Wu, Yun Xiong

State Key Laboratory of Applied Organic Chemistry, Key Laboratory of Nonferrous

Metal Chemistry and Resources Utilization of Gansu Province and Department of

Chemistry, Lanzhou University, Lanzhou 730000, People's Republic of China.

Fax: +86 931 8912582

Tel.: +86 931 8912387

E-mail: gaochm@lzu.edu.cn, mzliu@lzu.edu.cn

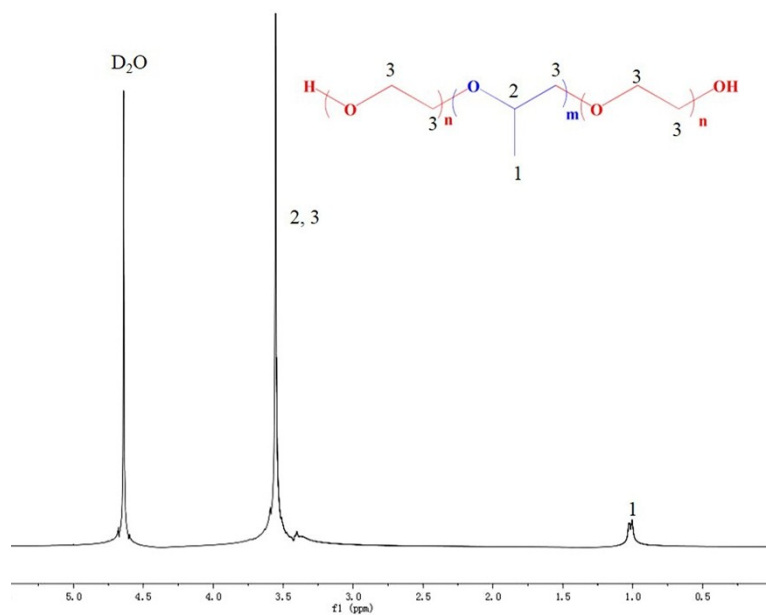

Figure S1  $^1\text{H}$  NMR spectrum of F127 ( $\text{D}_2\text{O}$ ).

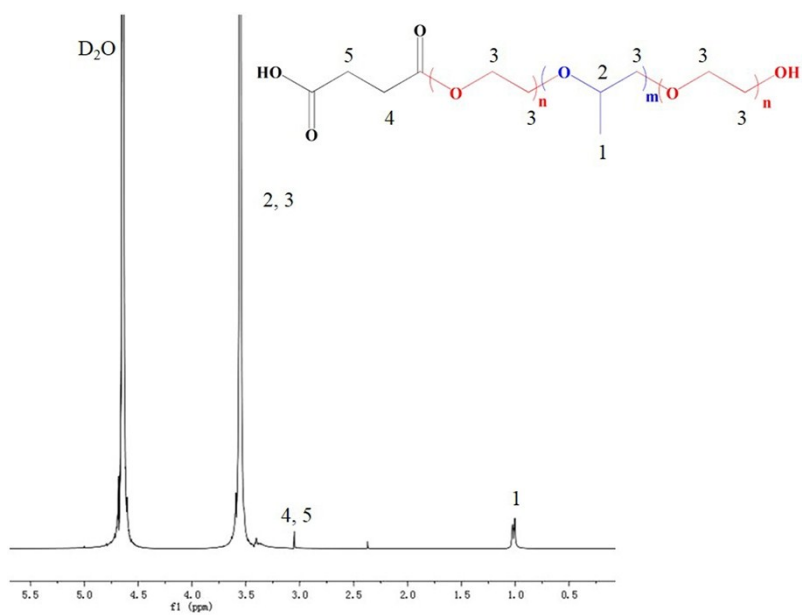

Figure S2  $^1\text{H}$  NMR spectrum of F127-COOH ( $\text{D}_2\text{O}$ ).

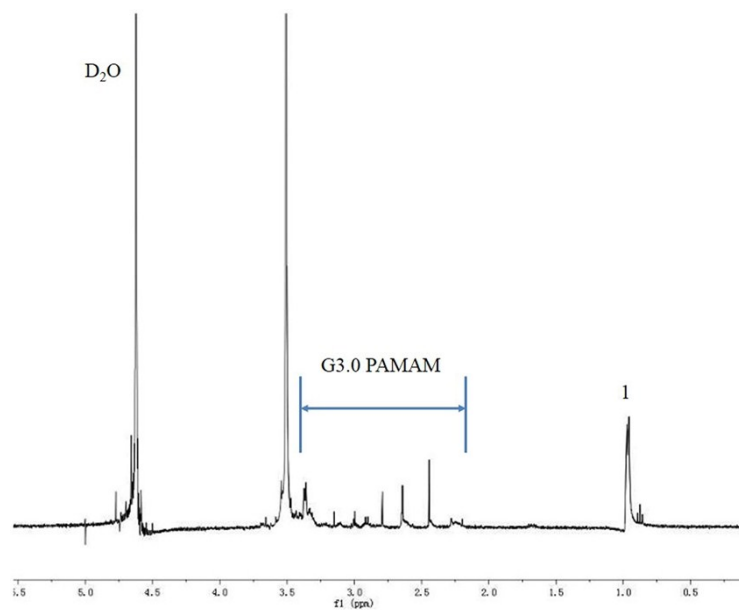

Figure S3  $^1\text{H}$  NMR spectrum of PAMAM/F127 ( $\text{D}_2\text{O}$ ).

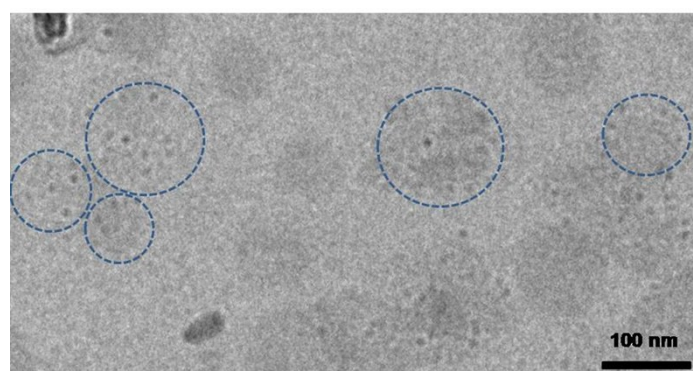

Figure S4 TEM image of PAMAM/F127 (The concentration is 10 mg/mL, the morphology was immediately investigated when the solution was prepared).

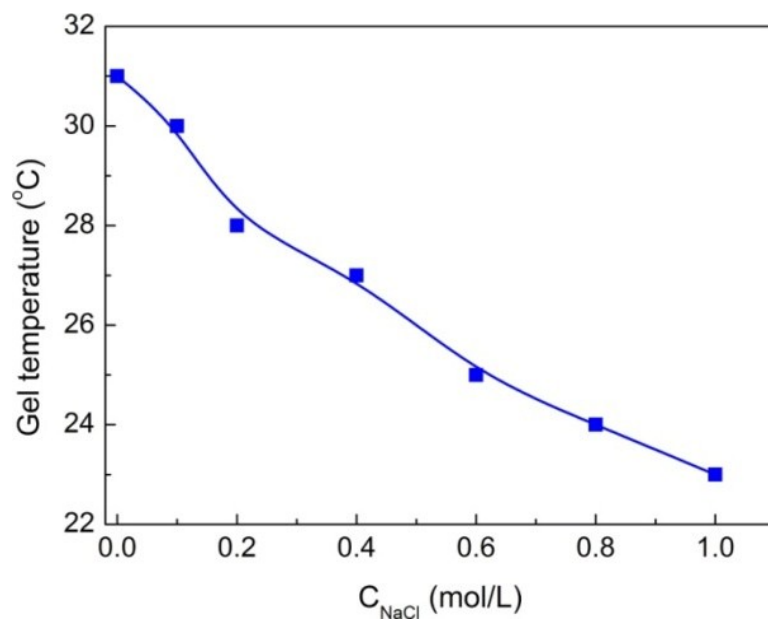

Figure S5. Effect of concentration of NaCl on gelation temperature (the concentration of PAMAM/F127 was 220 mg/mL).

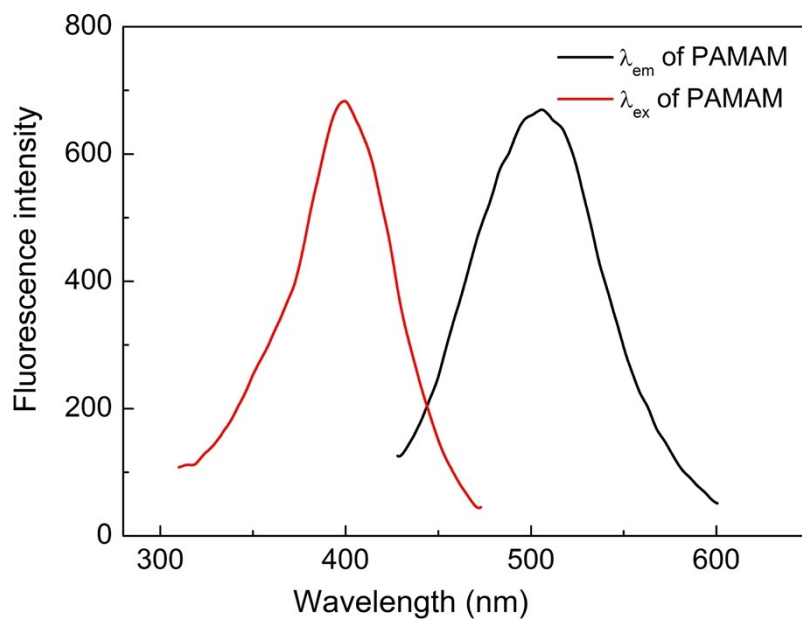

Figure S6. Emission/excitation spectra of PAMAM dendrimer (10 mg/mL).

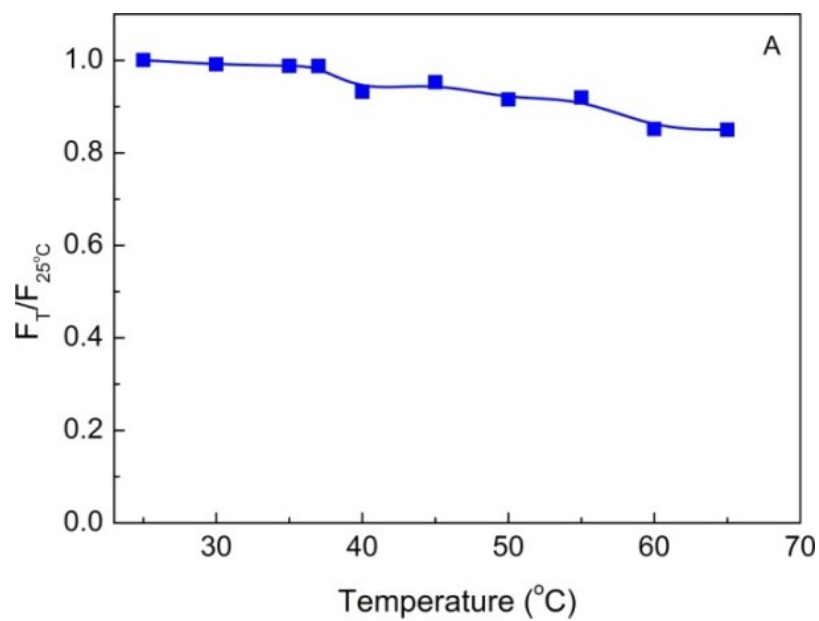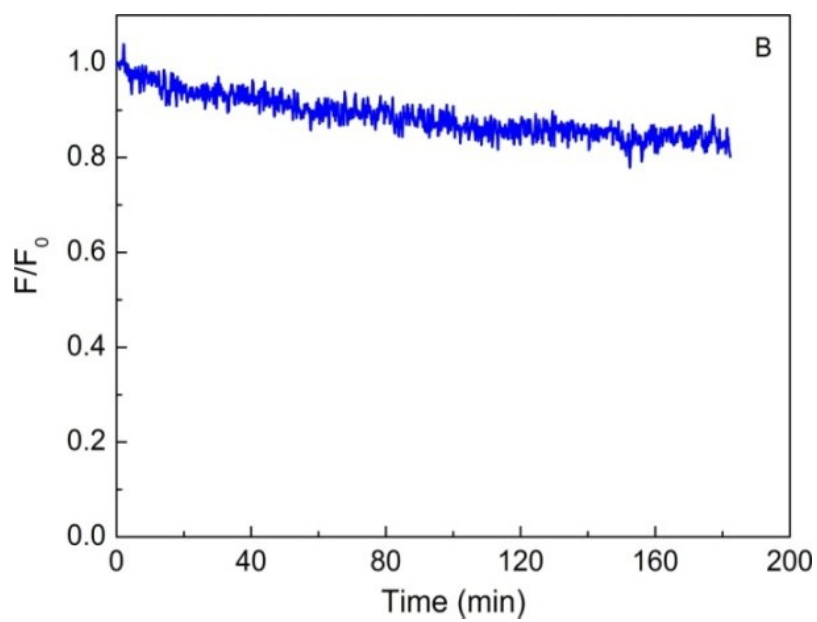

Figure S7. Effect of temperature (A) and time (B) on the fluorescence intensity of PAMAM/F127 dendritic polymer (10 mg/mL) ( $\lambda_{\text{ex}} = 325 \text{ nm}$ ,  $\lambda_{\text{em}} = 405 \text{ nm}$ ).

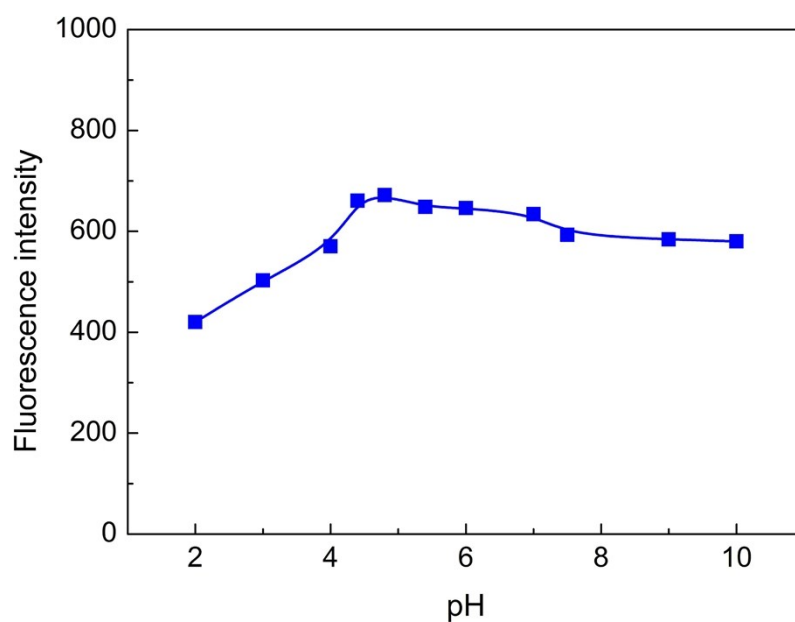

Figure S8. Effect of pH on the fluorescence intensity of PAMAM/F127 dendritic polymer (10 mg/mL) ( $\lambda_{\text{ex}} = 325 \text{ nm}$ ,  $\lambda_{\text{em}} = 405 \text{ nm}$ ).

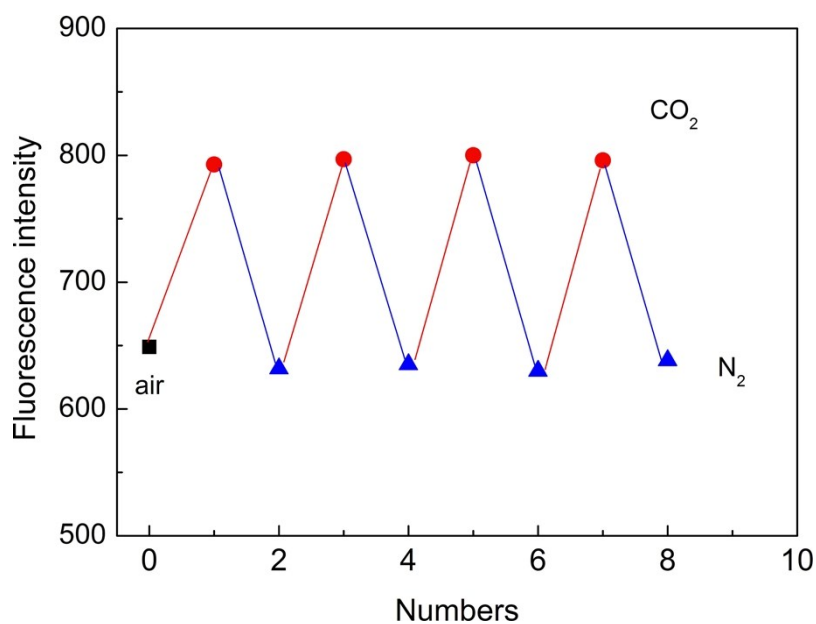

Figure S9. Changes in the fluorescence of PAMAM dendrimers (10 mg/mL) during cycles of CO<sub>2</sub> and N<sub>2</sub> treatments ( $\lambda_{\text{ex}} = 394 \text{ nm}$ ,  $\lambda_{\text{em}} = 506 \text{ nm}$ ).

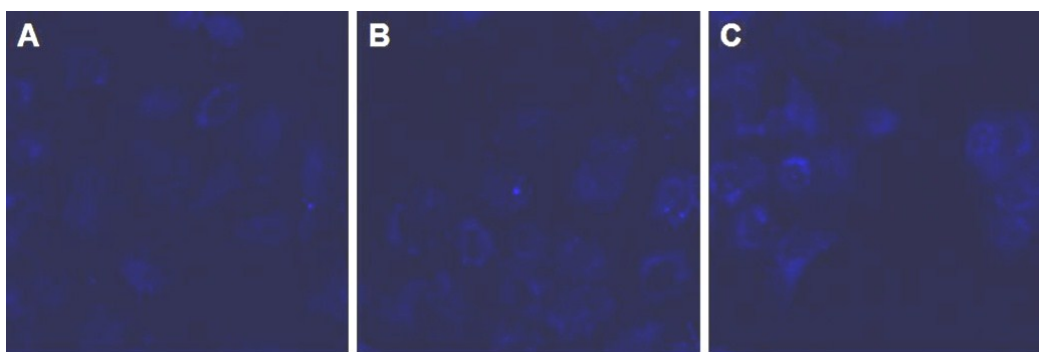

Figure S10. Confocal laser scanning microscopy images of A549 cells incubated with PAMAM/F127 dendritic polymer for 2 h under different condition (A: no CO<sub>2</sub>, B: 3% CO<sub>2</sub>, C: 5% CO<sub>2</sub>).

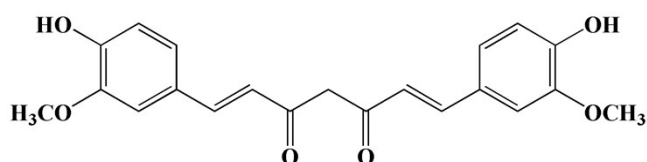

Figure S11. The chemical structure of curcumin.

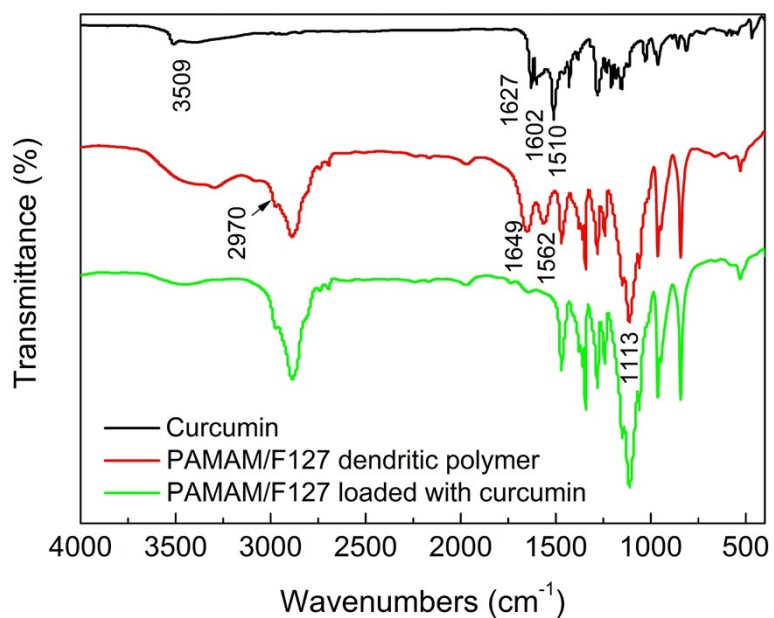

Figure S12. FT-IR spectra of curcumin, PAMAM/F127 dendritic polymer and PAMAM/F127 loaded with curcumin.

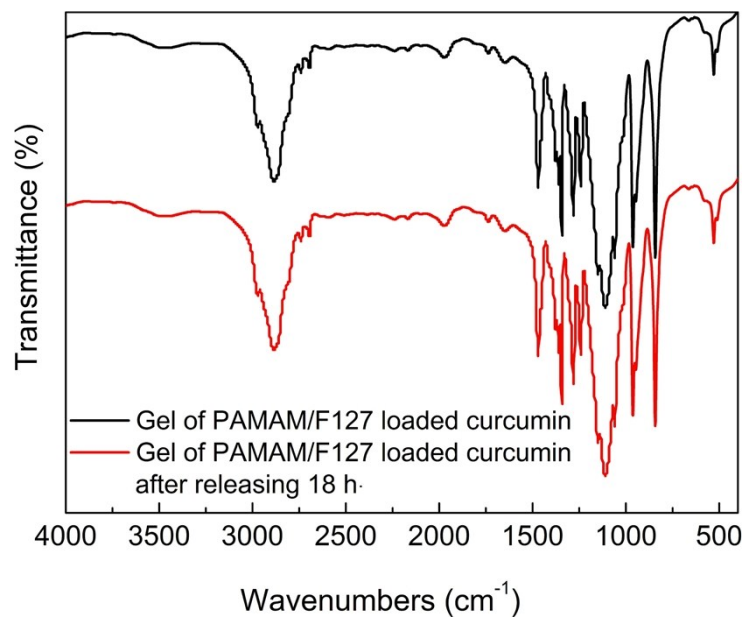

Figure S13. FT-IR spectra of the gel of PAMAM/F127 loaded with curcumin before releasing and after releasing 18 h.

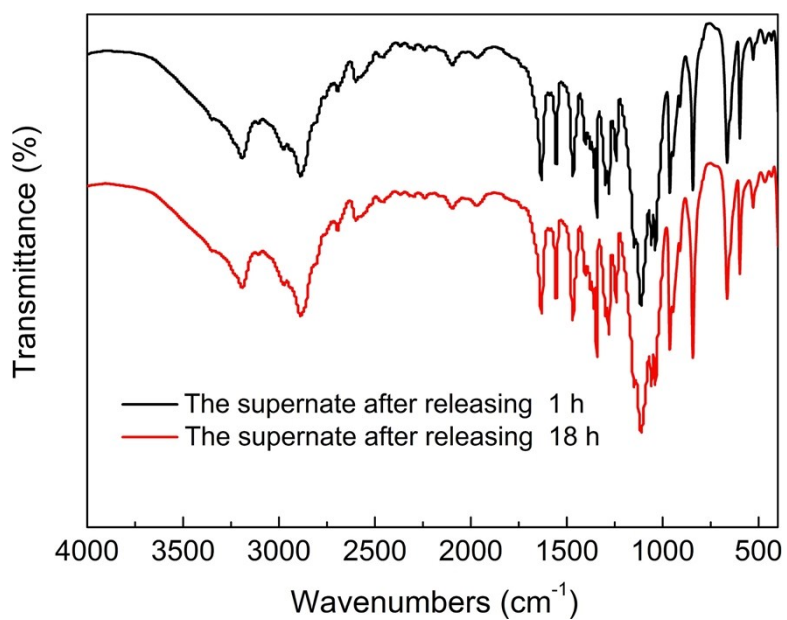

Figure S14. FT-IR spectra of the supernate after releasing 1 h and 18 h.
